# Supplementary material for: Overexpression of HvCslF6 in barley grain alters carbohydrate partitioning plus transfer tissue and endosperm development
Source: PubMed Central journal article supplement — J Exp Bot. 2019 Sep 19;71(1):138–53. doi: 10.1093/jxb/erz407 (PMC6913740; doi:10.1093/jxb/erz407), 2019-09-19
Supplement: erz407_suppl_supplementary_tables_s1-s2.pdf [file erz407_suppl_supplementary_tables_s1-s2.pdf]

**Table S1.** Carbohydrates content in (A) mature barley grain (embryo removed) and (B) mature embryo as percentage on a weight per weight basis (w/w) and per grain basis (milligram, mg). In case of MLG and starch measurements for mature grain ‘outer tissues’ and endosperm were analysed together. The embryo, containing low amounts of storage carbohydrates, was removed from mature grain and used for analysis of soluble sugars. The term “other” relates to grain constituents other than carbohydrates and proteins, including lipids, cellulose, lignin and other secondary metabolites (e.g. tocopherol, phytosterols), minerals and vitamins. \* indicates a significant difference from the WT by t-test with P-values of < 0.05. † indicates values for glucose and fructose, which were very low in mature tissues and are expressed as µg/grain. For soluble sugars two biological replicates with two tech. replicates each were analysed.

**A**

|                                                     | WT           | WT(tc)        | 15-3          | 16-5          | 18-6          | 25-5          |
|-----------------------------------------------------|--------------|---------------|---------------|---------------|---------------|---------------|
| <b>1000 ‘outer tissue’ and endosperm weight (g)</b> | 31.230±2.821 | 40.155±3.679  | 21.213±3.317  | 14.430±2.879  | 13.410±4.152  | 15.863±3.901  |
| <b>MLG (%w/w)</b>                                   | 3.854±0.306  | 5.645±0.454*  | 8.904±1.222*  | 9.576±0.244*  | 8.682±0.389*  | 9.485±0.242*  |
| <b>Starch (%w/w)</b>                                | 66.588±1.603 | 59.769±2.475* | 49.133±0.983* | 36.493±0.606* | 23.640±0.193* | 37.664±1.154* |
| <b>Total fructan (%w/w)</b>                         | 1.555±0.218  | 1.505±0.335   | 1.541±0.049   | 2.372±0.101*  | 3.872±0.050*  | 2.714±0.572*  |
| <b>Glucose (%w/w)</b>                               | 0.067±0.017  | 0.054±0.027   | 0.038±0.001   | 0.061±0.010   | 0.089±0.012   | 0.076±0.001   |
| <b>Fructose (%w/w)</b>                              | 0.081±0.022  | 0.061±0.013   | 0.043±0.010   | 0.046±0.009   | 0.087±0.026   | 0.056±0.013   |
| <b>Sucrose (%w/w)</b>                               | 0.936±0.212  | 0.963±0.184   | 1.785±0.241*  | 3.197±0.043*  | 4.977±0.109*  | 3.013±0.365*  |
| <b>Raffinose (%w/w)</b>                             | 0.340±0.024  | 0.332±0.007   | 0.320±0.028   | 1.351±0.221*  | 1.323±0.320*  | 0.826±0.092*  |
| <b>Arabinoxylan (%w/w)</b>                          | 4.421±0.365  | 4.336±0.325   | 6.622±1.250*  | 9.136±0.373*  | 13.156±0.501* | 8.171±0.038*  |
| <b>Protein (%w/w)</b>                               | 20.977±1.717 | 17.600±2.131  | 17.643±4.553  | 21.301±1.763  | 22.997±0.867  | 21.940±0.544  |
| <b>Other (%w/w)</b>                                 | 1.181        | 9.735         | 13.972        | 16.469        | 21.179        | 16.056        |
| <b>MLG (mg)</b>                                     | 1.147±0.025  | 2.116±0.018*  | 1.973±0.180*  | 1.148±0.102   | 0.852±0.001*  | 1.201±0.128*  |
| <b>Starch (mg)</b>                                  | 20.796±0.50  | 24.000±0.994* | 10.422±0.209* | 5.266±0.087*  | 3.170±0.026*  | 5.974±0.183*  |
| <b>Total fructan (mg)</b>                           | 0.486±0.068  | 0.604±0.135   | 0.327±0.011   | 0.342±0.015   | 0.519±0.007   | 0.431±0.091   |
| <b>Glucose (µg)<sup>†</sup></b>                     | 21.0±5.3     | 21.7±10.6     | 8.1±0.3       | 8.8±1.4       | 11.9±1.6      | 12.1±0.2      |
| <b>Fructose (µg)<sup>†</sup></b>                    | 25.4±7.0     | 24.4±5.2      | 9.2±2.2       | 6.6±1.4       | 11.6±3.5      | 8.8±2.1       |
| <b>Sucrose (mg)</b>                                 | 0.292±0.066  | 0.387±0.074   | 0.379±0.051   | 0.461±0.06    | 0.667±0.015   | 0.478±0.058   |
| <b>Raffinose (mg)</b>                               | 0.137±0.010  | 0.133±0.003   | 0.068±0.006   | 0.195±0.032   | 0.177±0.043   | 0.131±0.015   |
| <b>Arabinoxylan (mg)</b>                            | 1.381±0.114  | 1.741±0.131*  | 1.405±0.265   | 1.318±0.054   | 1.764±0.067*  | 1.296±0.006   |
| <b>Protein (mg)</b>                                 | 6.551±0.536  | 7.067±0.856   | 3.743±0.966*  | 3.074±0.254*  | 3.084±0.116*  | 3.480±0.086*  |

**B**

|                                  | WT           | WT(tc)       | 15-3         | 16-5         | 18-6         | 25-5         |
|----------------------------------|--------------|--------------|--------------|--------------|--------------|--------------|
| <b>1000 embryo weight (g)</b>    | 1.173±0.660  | 1.293±0.541  | 0.943±0.200  | 1.258±0.361  | 1.758±0.578  | 0.978±0.275  |
| <b>Total fructan (%w/w)</b>      | 5.159±0.591  | 5.861±0.365  | 4.963±0.185  | 3.958±0.232* | 4.963±0.638  | 4.493±0.455  |
| <b>Glucose (%w/w)</b>            | 0.128±0.032  | 0.120±0.001  | 0.127±0.026  | 0.052±0.010  | 0.088±0.019  | 0.105±0.026  |
| <b>Fructose (%w/w)</b>           | 0.101±0.034  | 0.050±0.007  | 0.038±0.010  | 0.027±0.008  | 0.028±0.06   | 0.029±0.008  |
| <b>Sucrose (%w/w)</b>            | 9.217±1.121  | 9.918±0.065  | 9.073±0.406  | 7.266±0.773* | 9.343±1.302  | 8.312±0.722  |
| <b>Raffinose (%w/w)</b>          | 12.716±0.903 | 12.026±0.152 | 9.998±1.719* | 12.957±0.865 | 11.681±0.001 | 11.757±0.142 |
| <b>Other (%w/w)</b>              | 72.680       | 72.025       | 75.801       | 75.740       | 73.897       | 75.304       |
| <b>Total fructan (mg)</b>        | 0.061±0.007  | 0.076±0.005  | 0.047±0.002  | 0.005±0.003  | 0.087±0.011  | 0.044±0.004  |
| <b>Glucose (µg)<sup>†</sup></b>  | 1.5±0.4      | 1.6±0.0      | 1.2±0.2      | 0.7±0.1      | 1.6±0.3      | 1.0±0.3      |
| <b>Fructose (µg)<sup>†</sup></b> | 1.2±0.4      | 0.7±0.1      | 0.4±0.1      | 0.3±0.1      | 0.5±0.1      | 0.3±0.1      |
| <b>Sucrose (mg)</b>              | 0.108±0.013  | 0.128±0.001  | 0.086±0.004  | 0.091±0.001  | 0.164±0.023  | 0.081±0.007  |
| <b>Raffinose (mg)</b>            | 0.149±0.011  | 0.155±0.002  | 0.094±0.011  | 0.163±0.011  | 0.205±0.007  | 0.115±0.001  |

**Table S2.** List of primers used for real-time PCR. # indicates primers that flanked between *HvCslF6* gene and NOS terminator. \* \*\* indicates  $\beta$ -fructofuranosidase (invertase) genes (INV\* indicates *HORVU6Hr1G011260* gene, INV\*\* indicates *HORVU2Hr1G109120* gene) which are involved in cleaving O-C (fructose) bond.

| Gene full name                         | Gene                     | HORVU/Accession number          | Sequence for forward primer (5'→3') | Sequence for reverse primer (5'→3') |
|----------------------------------------|--------------------------|---------------------------------|-------------------------------------|-------------------------------------|
| Granule bound starch synthase 1a       | GBSS 1a                  | FN179380.1                      | AGGACGTGCTTCTGG<br>AACTG            | CGAGAACCCTGAAGA<br>TGGAA            |
| Starch synthase 2                      | SS2                      | AH011942.2                      | GCCTCAACACGTACT<br>GGAAC            | ATCGCGTGATCCTTG<br>GTTACT           |
| Starch branching enzyme 1              | SBE1                     | FN179382.1                      | AACTTTGTCTTCCGG<br>TCACCT           | TTTACACAGCTCGAT<br>AATACTGCT        |
| Starch branching enzyme 2b             | SBE2b                    | AF064561                        | CGGAAACACGAGGA<br>AGATAAG           | TGGAGCATAGACAAC<br>ACAGGT           |
| Starch branching enzyme 2a             | SBE2a                    | AK373114.1                      | ACCAAGTAGCCGTTT<br>TGGAAC           | TGTGTATCAGTGCCA<br>TCGAAA           |
| Isoamylase 1                           | Iso1                     | AF490375.1                      | AGATGAAACAAAAGG<br>CGAGAT           | AGGGCGTGATACAA<br>GGATGAC           |
| Limit dextrinase                       | LD                       | AF252635.1                      | AAGTGAAAAGAACGA<br>AGATAA           | CCATCTCGGGGCTCT<br>CACCTC           |
| Cellulose synthase-like F6             | <i>CslF6</i> (wild type) | KP260639.1                      | TGGGCATTACCTTC<br>GTCAT             | TGTCCGGGCAAAC<br>CATCAA             |
| Cellulose synthase-like F6             | <i>CslF6</i> (transgene) | n/a#                            | TGGGCATTACCTTC<br>GTCAT             | TGATAATCATCGCAA<br>GACCG            |
| Cellulose synthase-like H1             | <i>CslH1</i>             | FJ459581.1                      | TGCTGTGGCTGGATG<br>GTGTT            | GCTTTATTATTGAGA<br>GAGATTGGGAGA     |
| Cellulose synthase-like F9             | <i>CslF9</i>             | EU267184.1                      | CTGCCACCGCGTCC<br>GTGTA             | AGGTTTTGCAGCATT<br>ACTTGA           |
| (1,3;1,4)-beta-glucanase E1            | <i>Endo E1</i>           | AK252046.1                      | AACGAGAACCAGAAG<br>GACAAC           | TACGGACATACGGG<br>CACTA             |
| Cellulose synthase 2                   | <i>CesA2</i>             | AY483152.1                      | CAGCCAGCCAGCAAT<br>TCTTTAT          | AACCGCATTCTTGCC<br>TTACAGA          |
| Sucrose synthase 1                     | <i>SuSy1</i>             | X65871.1                        | GTACGTGAGCAACCT<br>GGAGAG           | AATGTGCCGAGACAT<br>CAAATC           |
| Sucrose-phosphate synthase             | <i>SPS</i>               | AK366557                        | AACCACAGCGCTACC<br>AGACT            | TGATCCGCATTTGTA<br>TTGGA            |
| Sucrose-phosphatase                    | <i>SPP</i>               | AF493562.1                      | AAGTACCGATCATGG<br>GTGGA            | CTCAACCCCGGGATA<br>TTCTT            |
| Sucrose transporter 1                  | <i>SUT1</i>              | AM055812.1                      | TCGCATAGGCGTCGT<br>AACTA            | GGTTTGCTACACGCA<br>AGTCA            |
| Sucrose transporter 2                  | <i>SUT2</i>              | AJ272308.1                      | ACAAGGAAGGAAGG<br>CAGTT             | CCCACGGAGGAAAG<br>TAACAA            |
| Cell wall invertase 1                  | <i>CWINV1</i>            | AJ534447.1                      | CTCCGAGGGTATGG<br>ACGTAG            | TTTTTCACTCATCCG<br>GCAAT            |
| Vacuolar invertase                     | <i>VIN</i>               | JQ411255.1                      | CGGTGAGGCTCTATG<br>TGTGA            | CTAAGACGTCGAGG<br>CCATCT            |
| Sucrose:sucrose-1-fructosyltransferase | <i>1-SST</i>             | AK366020.1                      | GGGCTACGGTACGA<br>CTGG              | GGGTCTTCTCGTCAA<br>GCTC             |
| Fructan:fructan 1-fructosyltransferase | <i>1-FFT</i>             | JQ411253.1                      | GACGACCGGCGAGA<br>CTATTACG          | GACGCGTCGTACCT<br>GCCATA            |
| Sucrose:fructan 6-fructosyltransferase | <i>6-SFT</i>             | JQ411254.1                      | GACCCGGAGCTCGA<br>CTTG              | CCGGGTCTTCTCATC<br>CAGAG            |
| $\beta$ -fructofuranosidase            | <i>INV*</i>              | HORVU6Hv1G011260                | TTATTGTCACAGAAG<br>AGCAATGTG        | GATAACCATACATAG<br>TTGAGCAATTT      |
| $\beta$ -fructofuranosidase            | <i>INV**</i>             | HORVU2Hv1G109120/<br>AK367512.1 | CCAATTGTGGCTCAG<br>GTGTA            | GGGCATGCGTGCTAT<br>ACTTT            |
| Lipid transfer protein 2               | <i>Ltp2</i>              | X69793.1                        | TGTGCCAGTACGTCA<br>AGGAC            | GCTAGCCAGGAAGC<br>AAGCTA            |
